# 1 Prevalence of, and knowledge about intestinal helminths 2 among pregnant women at Adidome and Battor district 3 Hospitals

## 4 Author affiliations

| Order | Author                               | Email                                             | Contribution                                                 |
|-------|--------------------------------------|---------------------------------------------------|--------------------------------------------------------------|
| 1     | Charity Ahiabor <sup>1,3,4</sup>     | cahiabor@atu.edu.gh<br>cahiabor@noguchi.ug.edu.gh | Investigation, Writing<br>Original Draft<br>Review & Editing |
| 2     | Naa Adjeley<br>Frempong <sup>3</sup> | NTawiah@noguchi.ug.edu.gh                         | Investigation                                                |
| 3     | Atikatou Mama <sup>2,3</sup>         | matika1be@yahoo.fr                                | Investigation                                                |
| 4     | Kwadwo A. Kusi <sup>3</sup>          | AKusi@noguchi.ug.edu.gh                           | Investigation                                                |
| 5     | William Anyan <sup>3</sup>           | WAnyan@noguchi.ug.edu.gh                          | Review                                                       |
| 6     | Michael F. Ofori <sup>3</sup>        | MOfori@noguchi.ug.edu.gh                          | Supervision                                                  |
| 7     | Bright Adu <sup>3</sup>              | badu@noguchi.ug.edu.gh                            | Investigation                                                |
| 8     | Yvonne Ashong <sup>3</sup>           | yashong@noguchi.ug.edu.gh                         | Investigation                                                |
| 9     | Bernard W. Lawson <sup>4</sup>       | bwalterlawson@yahoo.com                           | Supervision &<br>Review                                      |
| 10    | Abraham K. Anang <sup>3</sup>        | Aanang@noguchi.ug.edu.gh                          | Supervision, Funding<br>Acquisition                          |
| 11    | Nicaise T. Ndam <sup>5</sup>         | nicaise.ndam@ird.fr                               | Supervision Funding<br>Acquisition,                          |
| 12    | David Courtin <sup>3,5</sup>         | david.courtin@ird.fr                              | Supervision, Funding<br>Acquisition                          |

6  
7

8 Affiliation: Department, Institution, City, State, Country

- 9 1. Science Laboratory Technology Department, Accra Technical University, Accra Ghana
- 10 2. MERIT, Institut de Recherche pour le Developement (IRD), Université de Paris, France
- 11 3. Noguchi Memorial Institute for Medical Research, University of Ghana. Accra, Ghana
- 12 4. TAB, Kwame Nkrumah University of Science and Technology, Kumasi, Ghana
- 13 5. CONS-HELM - Institut de Recherche pour le Developement (IRD), France

14

## 15 Abstract

16

17 **Background** This preprint reports new research that has not been certified by peer review and should not be used to guide clinical practice.

18 Soil Transmitted helminths and schistosomiasis may have implications for pregnancy  
19 outcomes especially, in rural communities. In Adidome (a rural community) and Battor (a  
20 semi-rural community), soil and water contact activities expose inhabitants to helminth  
21 infections. There is, however, limited information on the prevalence and determinants among  
22 pregnant women in these areas. The present study was conducted to assess the prevalence,  
23 knowledge and perceptions about helminthiasis among pregnant women accessing obstetric  
24 care at Adidome Government Hospital and Battor Catholic Hospital in the Volta region of  
25 Ghana.

## 26 **Methodology/Principal Findings**

27 A cross-sectional survey was conducted by recruiting 1,295 pregnant women out of which only  
28 616 representing 47.5% provided stool samples for analysis. Sociodemographic characteristics  
29 and participant knowledge on helminth infection transmission, symptoms and prevention were  
30 collected by questionnaire and analyzed using STATA. Preserved stool specimen were  
31 processed and examined for helminth eggs by Kato Katz, and genomic DNA extracted from  
32 aliquots, was tested for *S. mansoni* and *N. americanus*. Prevalence of helminths and participant  
33 knowledge were expressed in proportions. Chi-square and Fisher's exact test were used to show  
34 association at  $P < 0.05$  significant level. Intestinal helminth infections found among  
35 participants at ANC were *T. trichiura* (0.4%), *N. americanus* (0.4%) and *S. mansoni* (0.4%).  
36 At delivery, a PCR prevalence of 5% was observed for *S. mansoni*. A high proportion of study  
37 participants, 82.5% in Adidome and 87.1% in Battor do not take dewormers on regular basis.  
38 Also, a high proportion of participants did not receive any dewormer prior to sample collection.  
39 Although knowledge on helminth transmission, risks and prevention were low, levels of  
40 prevalence of infection with helminths were also low.

## 41 **Conclusion/Significance**

42 Intensifying health education as community-based interventions is necessary for the total and  
43 effective control and elimination of schistosomiasis and STH in the study area.

44

45 **Key words:** Prevalence, Helminths, Knowledge, Prevention.

## 46 **Author summary**

47 Adidome and Battor are two communities sited close to the Volta Lake which is known to be  
48 infested with intermediate hosts for schistosomiasis. Consequently, there has been continued  
49 efforts towards control by mass deworming especially among pre-school and school-going  
50 children. Despite these control efforts, infections persist as older age groups including pregnant  
51 women are often left out of such programs. The fertile soil in the Volta basin encourages  
52 farming activities which further expose the people to soil transmitted helminths. There is  
53 therefore a need to evaluate community knowledge on helminth infection and precautions to  
54 be taken to improve on the control efforts in the areas. The study selected two district Hospitals  
55 (a private Hospital in Battor and a government Hospital in Adidome) as study sites. Stool  
56 samples collected from pregnant women reporting for the first antenatal care and for delivery

57 were examined for the presence of helminths. Knowledge about helminths among participants  
58 were collated by questionnaire. Although prevalences of helminth infections were low,  
59 knowledge about helminth infections were also low. However, participants from Battor appear  
60 more knowledgeable about helminth infections than those in Adidome. Our study therefore  
61 suggests intensive public health education as an intervention for control.

## 62 **Introduction**

63 Schistosomiasis and Soil Transmitted Helminthiasis (STH) are parasitic diseases of medical  
64 and public health importance in many parts of the world. Classified among the neglected  
65 tropical diseases, they are prevalent in populations characterized by poverty and poor  
66 sanitation. STHs infect more than 1.5 billion people worldwide (1) accounting for nearly 3.3  
67 million disability-adjusted life years [DALYs]. Despite the goals set at the 54th World Health  
68 Assembly resolution (2), the number of people affected by these neglected diseases remains  
69 very high (3, 4).

70 In Ghana, the predominant STHs are *Necator americanus*, *Ascaris lumbricoides* and *Trichuris*  
71 *trichiura* (5). Transmission is either oral or by direct skin contact with the infective stages.  
72 Significant morbidities have been attributed to STH infections, including anemia, malnutrition,  
73 growth retardation and low intellectual ability (6). For pregnant women, these complications  
74 might have implications for pregnancy outcomes and neonatal health (3).

75 Two forms of schistosomiasis are observed in Ghana, ie urinary schistosomiasis caused by  
76 *Schistosoma haematobium* and intestinal schistosomiasis caused by *S. mansoni*. Transmission  
77 is by contact with contaminated freshwater body which harbours the specific snail intermediate  
78 hosts. People become infected during routine activities which bring them into contact with  
79 infected water bodies. In endemic communities, concurrent infections of the two forms of the  
80 disease have been reported (7). Symptoms include fever, joint and abdominal pains, bloody

81 diarrhea and hematuria and the infections are also known to contribute to the burden of anaemia  
82 in pregnancy (8)

83 Generally, higher prevalence of helminth infections are observed in younger people living in  
84 communities with inadequate sanitation, overcrowding, and low socioeconomic status (4,5)  
85 than in their older counterparts. Chronic STH infections tend to be asymptomatic (5) especially  
86 in low intensities and can prolong for a lifetime into adulthood.

87 In recent years, there has been a growing interest in the effect of helminth infections on  
88 pregnancy and pregnancy outcomes. Chronic helminth infection is reported to significantly  
89 increase maternal risks for future parasitic infections and adverse pregnancy outcomes. Infants  
90 born to malnourished mothers are often delivered prematurely, with low birth weight, and may  
91 have poor growth and development throughout childhood. (9,10).

92 Even though there is global commitment to implementing helminth control programs, the  
93 primary target population is usually school children. Older age groups including pregnant  
94 women are often left out despite the risk of serving as reservoirs for reinfection within the  
95 communities (11). Deworming with single dose 400mg albendazole or 500mg mebendazole  
96 has been used as public health intervention for pregnant women after the first trimester  
97 especially in communities where baseline prevalences of  $\leq 20\%$  have been observed for  
98 Hookworm and *T. trichiura* (12).

99 Battor-Dugame and Mafi-Adidome are two district capitals of the North Tongu and Central  
100 Tongu districts, respectively, which share a common boundary, thereby encouraging trade  
101 among them. The two communities are situated close to the Volta Lake which was created after  
102 the damming of the Volta River and consequently, has become infested with the snail  
103 intermediate hosts for schistosomiasis. The lake serves as a source of potable water for many  
104 households. Farming activities in the Volta basin along the Lake expose the people to STHs  
105 while water contact activities also expose them to schistosomiasis. Information on helminth

106 infections among pregnant women in the study area is limited, following the continued focus  
107 on school children for helminth control (13,14).

108 Adidome Government Hospital (AGH) and Battor Catholic Hospital (BCH) are the main  
109 referral centers in Mafi-Adidome and Battor-Dugame, respectively. Stool examinations in  
110 these hospitals are performed only upon the request of the medical officer in charge and not on  
111 routine basis. Consequently, the needed treatment for asymptomatic pregnant patients may be  
112 overlooked. The WHO target for the elimination of schistosomiasis and soil-transmitted  
113 helminths by 2030 warrants a clear understanding of community knowledge about these  
114 infections.

115 The **aim** of this study, therefore, was to determine prevalence of STH and *S. mansoni* and risk  
116 factors in relation to local knowledge on symptoms and prevention amongst pregnant women  
117 reporting at Adidome Government Hospital and Battor Catholic Hospital for obstetric care.

118 The specific objectives were to:

- 119 1. Determine prevalence of STH and *S. mansoni*.
- 120 2. Evaluate the deworming history among study participants.
- 121 3. Estimate local knowledge on causes, symptoms and prevention of helminth infections.
- 122 4. Show knowledge about helminth infections across sociodemographic characteristics.

## 123 **Methods**

### 124 **Study area and study site**

125 Battor-Dugame (North Tongu District capital) and Mafi-Adidome (Central Tongu District  
126 capital) have tropical climate which is favorable for farming, a major occupation for 73.5% of  
127 households in North Tongu and 78.4% in Central Tongu. There are two rainy seasons: a major  
128 season from mid-April to early July and a minor season from September to November. Average  
129 annual rainfall varies between 900 mm to 1100 mm with 50% occurring in the major season.  
130 Daily minimum and maximum temperatures range between 22°C and 33°C with average

131 humidity around 80% (15,16). The natural vegetation is savannah grassland. Aside crop  
132 farming, some households also engage in fish farming, livestock rearing and petty trading.  
133 Transportation in the north and central Tongu districts is by motorcycles, taxies, small buses  
134 and private cars. People living on the banks of the lake also use small canoes for navigation.  
135 Accommodation in Battor-Dugame and in Mafi-Adidome ranges from large extended family  
136 settlements to smaller nuclear family houses. Toilet facilities range from privately owned to  
137 public pit latrines, KVIPs and water closets. Some residents however, resort to open defecation  
138 in the surrounding bushes due to the absence of these facilities within their households.  
139 Battor-Dugame has a semi-urban structure with a literacy rate of 74% (ie 51.7% male and  
140 48.4% female) (15) while Mafi-Adidome has sparse or scattered settlements with small clusters  
141 of households near the central market. The literacy rate is 72% ie 52% male and 48% female  
142 (16). The catchment area for AGH includes neighboring towns and small communities such as  
143 Mepe, Volo, Mafi-Kumase, Bakpa, Battor etc, while BCH also receives patients from adjoining  
144 towns and communities such as Mepe, Osudoku, Ada East and West, Volo, Abutia, Mafi-  
145 Adidome etc.

## 146 **Study design and participant recruitment**

147 This is a cross sectional survey targeting pregnant women reporting at two health facilities for  
148 their first ANC visit and for delivery. Stool samples were collected from consenting pregnant  
149 women during the first ANC attendance and as they report for delivery, between November  
150 2016 and March 2019. Participants who could not provide samples the same day were asked  
151 to bring their samples the following day. Information about sociodemographic characteristics  
152 and knowledge (or myths) on helminth infection transmission, prevention, and symptoms were  
153 collected by questionnaire interviews. Aliquots of the stool samples were preserved at 4°C for  
154 Kato-Katz detection and at -20°C for PCR.

## 155 **Sample size calculation**

156 Sample size was calculated using a confidence interval of 95% and an estimated prevalence of  
157 17% (17). The minimum sample size ‘n’ was calculated by the equation:  $n = \frac{Z^2P(1-P)}{D^2}$  (18),  
158 where ‘D’ is the margin of error (5%), ‘n’ is the minimum sample size, ‘P’ is the estimated  
159 prevalence and ‘Z’ is the standard normal deviate that corresponds to the 95% confidence  
160 interval (16). Therefore, the minimum sample size required was 216 per study area.

## 161 **Ethical considerations**

162 Ethical and scientific approvals for the study were obtained from the Ghana Health Service  
163 Ethical Review Committee (GHS\_ERC06/06/16) and the Institutional Review Board of the  
164 Noguchi Memorial Institute for Medical Research (NMIMR-IRB CPN 071/15-16 amend.  
165 2017). Participants who agreed to be part of the study and signed the consent form were  
166 assigned unique IDs. Parental consent was obtained on behalf of participating minors (<18  
167 years) who also gave their assent.

## 168 **Stool analysis**

169 Two Kato-Katz thick smears were prepared from each stool sample and observed  
170 microscopically for helminth ova. Genomic DNA was extracted from aliquots of the stool  
171 samples using the Qiagen stool DNA kit according to the manufacturer’s protocol after which  
172 species-specific primers were used to detect *Necator americanus* and *S. mansoni* by PCR.  
173 Optimization of PCR for *Ascaris* and *Trichuris* was not performed due to limited resource.

## 174 **Data capture and analysis.**

175 Knowledge on helminth infection acquisition, symptoms, prevention and associated risks for  
176 the mother and for the baby were obtained by questionnaire, analyzed and expressed in  
177 proportions. Chi-square test and Fisher’s exact test were used to show correlations between  
178 categorical variables and the outcomes at p<0.05 significance level.

179 **Results**

180 **Sociodemographic characters**

181 A total of 1,295 pregnant women were interviewed. However, only 616 pregnant women  
 182 provided stool samples for analysis, comprising 249 participants from AGH and 367  
 183 participants from BCH. Mean ages of participants were 25.9(±6.5) years at AGH and  
 184 27.4(±6.0) years at BCH ( $t = -3.46, p < 0.001$ ). Most of the participants were basic school  
 185 (primary and junior high school) leavers. The proportion of primary school leavers were 24.6%  
 186 at AGH and 20.5% at BCH. While Junior High School (JHS) and Senior High School (SHS)  
 187 leavers were 53.0% and 10.6% respectively at AGH and 43.4% and 14.0% respectively at  
 188 BCH. Only a small proportion had completed tertiary level education. These were 1.6% at  
 189 AGH and 10.8% at BCH ( $\chi^2(4) = 37.96, p < 0.001$ ).

190 **Prevalence of helminth infections**

191 Species of helminths observed were *Schistosoma mansoni*, *Trichuris trichiura* and *Necator*  
 192 *americanus*. Very low prevalences of 0.4% and 0.6% was recorded for *S. mansoni* by  
 193 microscopy among ANC participants in Adidome and Battor respectively and this was  
 194 confirmed by PCR at 0.4% and 1.4% respectively. STH infections were only observed among  
 195 ANC participants. A microscopy prevalence of 0.4% for *T. trichiura* was recorded at Adidome  
 196 ANC and a PCR prevalence of 0.4% for *N. americanus* was recorded at Battor ANC. Among  
 197 participants at delivery, a PCR prevalence of 5% was recorded for *S. mansoni* in Battor.

198 **Table 1: Prevalence of STH and *S. mansoni***

| Study Site | Microscopy (n, %) |                   |         | PCR (n, %)        |         |
|------------|-------------------|-------------------|---------|-------------------|---------|
|            | Dept/unit         | <i>S. mansoni</i> | STH     | <i>S. mansoni</i> | STH     |
| AGH        | ANC               | 1(0.4%)           | 1(0.4%) | 1(0.4%)           | 0%      |
|            | Delivery          | 0%                | 0%      | 0%                | 0%      |
| BCH        | ANC               | 2(0.6%)           | 0%      | 4(1.4%)           | 1(0.4%) |
|            | Delivery          | 0%                | 0%      | 5(5.0%)           | 0%      |

199 AGH=Adidome Government Hospital, BCH= Battor Catholic Hospital, STH= Soil Transmitted Helminth

200



201 **Deworming history, worm infection and knowledge about**  
202 **dewormers**

203 Table 2 is the summary of the responses to questions on the deworming habits among ANC  
204 participants. Majority of them, comprising 82% in Adidome and 87% in Battor, do not  
205 regularly take dewormers. A Chi-square test however, showed a statistically significant  
206 difference ( $p < 0.001$ ) in regular deworming across the two health facilities. For those who  
207 regularly take dewormers, a proportion of 13.1% was observed in Adidome and 12.6% in  
208 Battor. Nearly all the participants (100% in Adidome and 99% in Battor) did not receive  
209 dewormers prior to stool sample collection. Also, whereas 29% of participants in Battor did  
210 not take dewormers because in their opinion, it was too early in the pregnancy, 89% in Adidome  
211 did not take dewormers because the medicines were not available in the health facility ( $X^2(4)$   
212  $= 634.48$ ,  $p < 0.001$ ).

213 **Table 2: Deworming habits and worm infection at ANC**

|                                    | ANC Health facility,<br>N (%) |             | Test statistic  | P-value       |
|------------------------------------|-------------------------------|-------------|-----------------|---------------|
|                                    | Adidome                       | Battor      |                 |               |
| Carry out regular deworming        |                               |             | $X^2(2)=14.75$  | $p < 0.001$   |
| No                                 | 372 (82.5)                    | 331 (87.1)  |                 |               |
| Yes                                | 59 (13.1)                     | 48 (12.6)   |                 |               |
| Don't know                         | 20 (4.4)                      | 1 (0.3)     |                 |               |
| Had worms during current pregnancy |                               |             | $X^2(2)=37.89$  | $p < 0.001$   |
| No                                 | 435 (96.5)                    | 320 (84.2)  |                 |               |
| Yes                                | 1 (0.2)                       | 1 (0.3)     |                 |               |
| Don't know                         | 15 (3.3)                      | 59 (15.5)   |                 |               |
| Received dewormer today            |                               |             | $X^2(1)=4.77$   | $p = 0.043^f$ |
| No                                 | 451 (100.0)                   | 376 (99.0)  |                 |               |
| Yes                                | 0 (0.0)                       | 4 (1.0)     |                 |               |
| Reason for no dewormer today       |                               |             | $X^2(4)=634.48$ | $p < 0.001$   |
| Too early in pregnancy             | 22 (4.9)                      | 109 (29.0)  |                 |               |
| Not available in facility          | 402 (89.1)                    | 6 (1.6)     |                 |               |
| Not offered                        | 19 (4.2)                      | 162 (43.1)  |                 |               |
| Not tested for worms               | 6 (1.3)                       | 19 (5.1)    |                 |               |
| Other reasons                      | 2 (0.4)                       | 80 (21.3)   |                 |               |
| Total                              | 451 (100.0)                   | 380 (100.0) |                 |               |

214  $X^2(df)$  = Chi-square (degrees of freedom),  $f$  = Fisher's exact p-value.

215

216 Deworming habits and knowledge of dewormers among participants at delivery is presented in

217 Table 3. Here too, a high percentage of participants reportedly did not take any dewormers

218 during the pregnancy and they were 71.4% in Adidome and 87.1% in Battor. For those who  
 219 took dewormers, 55.8% in Adidome and 61.9% in Battor took Albendazole, while 14% in  
 220 Adidome and 19.1% in Battor took Mebendazole. Few participants however could not tell  
 221 whether they had taken dewormers or not. Only a small proportion of participants (3% in  
 222 Adidome and 1.2% in Battor) showed knowledge of herbal preparations against intestinal  
 223 worm infections (p=0.343).

224 **Table 3: Deworming history and knowledge about dewormers at delivery**

|                                                 | Delivery Health facility,<br>N (%) |             | Test statistic | P-value              |
|-------------------------------------------------|------------------------------------|-------------|----------------|----------------------|
|                                                 | Adidome                            | Battor      |                |                      |
| Taken dewormer during current pregnancy:        |                                    |             | $X^2(1)=14.67$ | p<0.001              |
| No                                              | 215 (71.4)                         | 142 (87.1)  |                |                      |
| Yes                                             | 86 (28.6)                          | 21 (12.9)   |                |                      |
| Type of dewormer taken:                         |                                    |             | $X^2(3)=1.40$  | p=0.706              |
| Albendazole                                     | 48 (55.8)                          | 13 (61.9)   |                |                      |
| Mebendazole                                     | 12 (14.0)                          | 4 (19.1)    |                |                      |
| Don't know                                      | 24 (27.9)                          | 4 (19.1)    |                |                      |
| Other                                           | 2 (2.3)                            | 0 (0.0)     |                |                      |
| Know herbal preparation used to treat worms     |                                    |             | $X^2(1)=1.42$  | p=0.343 <sup>f</sup> |
| No                                              | 292 (97.0)                         | 161 (98.8)  |                |                      |
| Yes                                             | 9 (3.0)                            | 2 (1.2)     |                |                      |
| Can 0-6 month old babies get worm infestations? |                                    |             | $X^2(2)=4.90$  | p=0.086              |
| No                                              | 46 (15.3)                          | 30 (18.4)   |                |                      |
| Yes                                             | 85 (28.2)                          | 31 (19.0)   |                |                      |
| Don't know                                      | 170 (56.5)                         | 102 (62.6)  |                |                      |
| Total                                           | 301 (100.0)                        | 163 (100.0) |                |                      |

225  $X^2(df)$  = Chi-square (degrees of freedom), <sup>f</sup> = Fisher's exact p-value.

## 226 Knowledge on helminthiasis

227 The level of participants' knowledge about helminth infection estimated as the number of  
 228 correct answers to questions and expressed as a percentage of the highest possible score is  
 229 presented in Table 4. Knowledge levels were categorised into 'Low' (0-33.33%), 'Medium'  
 230 (33.34-66.66%) and 'High' (66.67-100%). Very high percentages of participants (both at ANC  
 231 and delivery) showed 'Low knowledge'. Average score among ANC participants were 17.7%  
 232 ( $\pm 10.8$ ) in Adidome and 26.0% ( $\pm 15.8$ ) in Battor ( $X^2(2)=76.54$ , p<0.001). At delivery, average

233 scores were 19.4% ( $\pm 13.3$ ) and 22.2% ( $\pm 16.1$ ) in Adidome and Battor respectively ( $X^2(1)$   
234  $=1.19, p=0.276$ ).

235 **Table 4: Level of knowledge of helminthiasis**

|                 | ANC Health facility,<br>N (%) |             | Test statistic<br>P-value     | Delivery Health facility,<br>N (%) |             | Test<br>statistic<br>P-value |
|-----------------|-------------------------------|-------------|-------------------------------|------------------------------------|-------------|------------------------------|
|                 | Adidome                       | Battor      |                               | Adidome                            | Battor      |                              |
| Knowledge level |                               |             | $X^2(2)=76.54$<br>$p<0.001^f$ |                                    |             | $X^2(1)=1.19$<br>$p=0.276$   |
| Low             | 430 (95.3)                    | 281 (74.0)  |                               | 242 (80.4)                         | 124 (76.1)  |                              |
| Medium          | 21 (4.7)                      | 98 (25.8)   |                               | 59 (19.6)                          | 39 (23.9)   |                              |
| High            | 0 (0.0)                       | 1 (0.3)     |                               | 0 (0.0)                            | 0 (0.0)     |                              |
| Total           | 451(100.0)                    | 380(100.0)  |                               | 301(100.0)                         | 163(100.0)  |                              |
| Mean (SD)       | 17.7 (10.8)                   | 26.0 (15.8) |                               | 19.4 (13.3)                        | 22.2 (16.1) |                              |

236 Knowledge level: Low = 0-33.33%, Medium = 33.34-66.66%, High = 66.67-100%  
237  $X^2(df)$  = Chi-square (degrees of freedom),  $f$  = Fisher's exact p-value.

238  
239 A comparison of the range of scores between ANC and delivery participants on knowledge  
240 about helminthiasis is presented in Figure 1. Though the median scores (<20%) at the two units  
241 (ANC–Delivery) appear similar and positively skewed, a bigger box, indicating a wider  
242 interquartile range was obtained at delivery. The range of values however were more varied at  
243 ANC than at delivery as more ANC participants had extremely high scores than those at  
244 delivery.

245

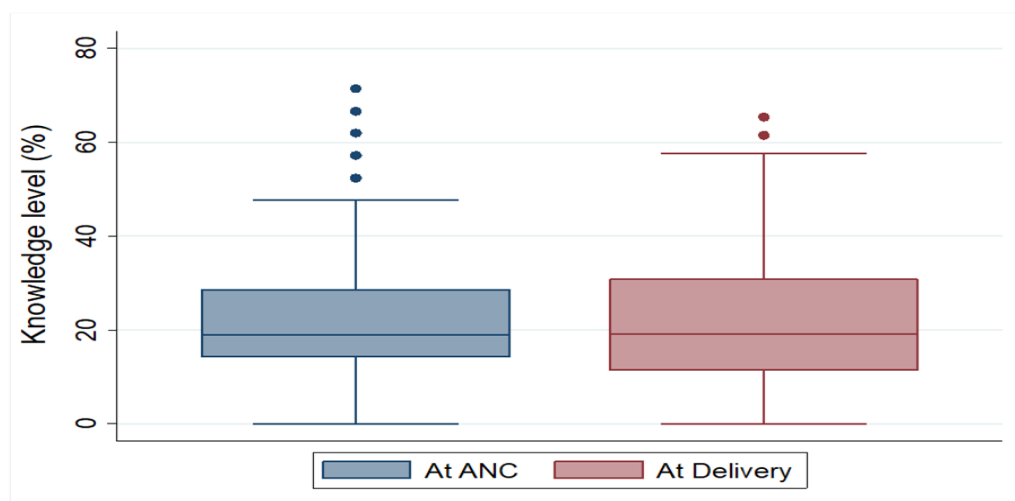

246  
247 Figure 1: Comparison of general knowledge (% scale) at ANC and Delivery.  
248

249 In Table 5 is the detailed summary of responses to questions on risks and prevention of  
250 helminth infections during pregnancy. The highest proportions of 69.2% in Battor and 27.3%

251 in Adidome ticked anaemia as the risk of helminth infection during pregnancy. A much lower  
 252 proportion (11.3% in Battor and 13.1% in Adidome) ticked ‘low birth weight’ ( $X^2(16)=229.48$ ,  
 253  $p<0.001$ ). Participants who indicated ‘no knowledge’ were 38.6% in Adidome and 22.6% in  
 254 Battor.

255 **Table 5: Knowledge about the risk and prevention of helminths during pregnancy**

|                                               | ANC Health facility, N (%) |             | Test statistic   | P-value   |
|-----------------------------------------------|----------------------------|-------------|------------------|-----------|
|                                               | Adidome                    | Battor      |                  |           |
| Knowledge about risks during pregnancy**      |                            |             | $X^2(16)=229.48$ | $p<0.001$ |
| Anaemia                                       | 123 (27.3)                 | 263 (69.2)  |                  |           |
| Complications of the pregnancy                | 95 (21.1)                  | 86 (22.6)   |                  |           |
| Low birth weight                              | 59 (13.1)                  | 43 (11.3)   |                  |           |
| Preterm birth                                 | 39 (8.7)                   | 20 (5.3)    |                  |           |
| No knowledge                                  | 174 (38.6)                 | 86 (22.6)   |                  |           |
| Knowledge about prevention during pregnancy** |                            |             | $X^2(3)=4.34$    | $p=0.227$ |
| No knowledge                                  | 341 (75.6)                 | 308 (81.1)  |                  |           |
| Taking Dewormer                               | 100 (22.2)                 | 68 (17.9)   |                  |           |
| Traditional/herbal prevention                 | 2 (0.4)                    | 1 (0.3)     |                  |           |
| Total                                         | 451 (100.0)                | 380 (100.0) |                  |           |

256 \*\*Multiple responses allowed and so totals for variable may exceed totals below.

257  $X^2(df)$  = Chi-square (degrees of freedom).

258  
 259 On the issue of knowledge about the prevention of helminths during pregnancy, a high  
 260 proportion of participants (75.6% in Adidome and 81.1% in Battor) also indicated ‘no  
 261 knowledge’. A small proportion of participants (0.4% in Adidome and 0.3% in Battor) however  
 262 specified knowledge of ‘herbal preparations’ while (22.2% in Adidome and 17.9% in Battor)  
 263 specified taking ‘dewormers’ as the prevention methods during pregnancy ( $X^2(3) = 4.34$ ,  $p =$   
 264  $0.227$ ).

265 The questions on prevention of helminths in newborn babies got responses such as  
 266 ‘Boiling/filtering drinking water’, ‘Exclusive breast feeding’, ‘Good personal hygiene’ and  
 267 ‘Deworming every three months’ as presented in Table 6. In Adidome, only 5.3% and 3.0%  
 268 stated ‘boiling/filtering drinking water’ and ‘Deworming every three months’ respectively as  
 269 preventive measures for babies. Similarly, in Battor, a proportion of 12.9% and 3.1%  
 270 participants respectively held the same view. Participants who stated, ‘Exclusive breast

271 feeding’ were 14.6% in Adidome and 14.7% in Battor. ‘Good personal hygiene’ was chosen  
272 by 14.3% of participants in Adidome as against 9.2% participants in Battor ( $X^2(31) = 50.94$ ,  $p$   
273  $= 0.013$ ).

274 **Table 6: Knowledge about prevention of helminths in newborn babies**

|                                                    | Delivery Health facility,<br>N (%) |            | Test statistic<br>P-value        |
|----------------------------------------------------|------------------------------------|------------|----------------------------------|
|                                                    | Adidome                            | Battor     |                                  |
| Knowledge about prevention of<br>worms in babies** |                                    |            | $X^2(31) = 50.94$<br>$p = 0.013$ |
| Boiling/filtering drinking water                   | 16 (5.3)                           | 21 (12.9)  |                                  |
| Exclusive breast feeding                           | 44 (14.6)                          | 24 (14.7)  |                                  |
| Clean environment                                  | 27 (9.0)                           | 9 (5.5)    |                                  |
| Good personal hygiene                              | 43 (14.3)                          | 15 (9.2)   |                                  |
| Eating properly cooked meals                       | 14 (4.7)                           | 2 (1.2)    |                                  |
| Deworming every 3 months                           | 9 (3.0)                            | 5 (3.1)    |                                  |
| Total                                              | 301(100.0)                         | 163(100.0) |                                  |

275 \*\*Multiple responses allowed and so totals for variable may exceed totals below.

276  $X^2(df) =$  Chi-square (degrees of freedom).

277

278 Details of responses on general knowledge about the causes, symptoms and prevention of  
279 helminth infections are presented in Table 7. A general observation shows the highest  
280 proportion of participants both at ANC and delivery selected ‘vomiting’ as a symptom of  
281 helminth infection. Among ANC participants, the proportions were 33.9% in Adidome and  
282 45.3% in Battor and among delivery participants, the proportions were 45.2% in Adidome and  
283 45.4% in Battor. ‘Stomach ache’ and ‘diarrhoea’ were other common responses observed  
284 among participants as symptoms of helminth infections. Among ANC participants in Adidome,  
285 the proportions observed were 22.2% and 22.6% respectively. In Battor too, the proportions  
286 were 13,7% and 32.1% respectively. Among delivery participants in Adidome, the proportions  
287 observed for ‘Stomach ache’ and ‘diarrhoea’ were 38.5% and 22.3%, respectively and in Battor  
288 53.4% and 23.3%, respectively, were observed.

289 General knowledge about the cause of helminth infections showed majority of Adidome  
290 participants at ANC (26.2%) and delivery (39.2%) ticked ‘eating improperly cooked food’.

291 The highest proportion of participants who ticked ‘playing in the sand’ was observed among

292 delivery participants in Adidome (39.5%) and the highest proportion who ticked ‘poor  
293 sanitation’ was observed among ANC participants in Battor.

**Table 7: General knowledge on causes, symptoms and prevention of helminthiasis**

|                                              | ANC Health facility,<br>N (%) |            | Test statistic                | Delivery Health facility,<br>N (%) |             | Test statistic                |
|----------------------------------------------|-------------------------------|------------|-------------------------------|------------------------------------|-------------|-------------------------------|
|                                              | Adidome                       | Battor     | P-value                       | Adidome                            | Battor      | P-value                       |
| Knowledge on symptoms of worm infections**   | 102 (22.6)                    | 122 (32.1) | $X^2(37) = 111.57$<br>p<0.001 | 67 (22.3)                          | 38 (23.3)   | $X^2(47) = 107.49$<br>p<0.001 |
| Diarrhoea                                    | 70 (15.5)                     | 42 (11.1)  |                               | 14 (4.7)                           | 38 (23.3)   |                               |
| Headache                                     | 153 (33.9)                    | 172 (45.3) |                               | 136 (45.2)                         | 74 (45.4)   |                               |
| Vomiting                                     | 100 (22.2)                    | 52 (13.7)  |                               | 116 (38.5)                         | 87 (53.4)   |                               |
| Stomach ache                                 | 38 (8.4)                      | 32 (8.4)   |                               | 11 (3.7)                           | 31 (19.0)   |                               |
| Weakness                                     | 67 (14.9)                     | 33 (8.7)   |                               | 82 (27.2)                          | 66 (40.5)   |                               |
| Loss of appetite                             |                               |            |                               |                                    |             |                               |
| Knowledge on causes of worm infections**     | 118 (26.2)                    | 229 (60.3) | $X^2(20) = 196.51$<br>p<0.001 | 118 (39.2)                         | 80 (49.1)   | $X^2(28) = 79.21$<br>p<0.001  |
| Eating improperly cooked food                | 80 (17.7)                     | 146 (38.4) |                               | 119 (39.5)                         | 48 (29.6)   |                               |
| Playing in the sand                          | 86 (19.1)                     | 171 (45.0) |                               | 104 (34.6)                         | 73 (44.8)   |                               |
| Poor sanitation                              | 67 (14.9)                     | 79 (20.8)  |                               | 103 (34.2)                         | 52 (31.9)   |                               |
| Exposure to human excreta                    | 5 (1.1)                       | 3 (0.8)    |                               | 9 (3.0)                            | 26 (16.0)   |                               |
| Malnutrition                                 |                               |            |                               |                                    |             |                               |
| Knowledge on prevention of worm infections** | 142 (31.5)                    | 218 (57.4) | $X^2(23) = 223.01$<br>p<0.001 | 127 (42.2)                         | 80 (49.1)   | $X^2(26) = 45.09$<br>p=0.011  |
| Clean environment                            | 213 (47.2)                    | 150 (39.5) |                               | 144 (47.8)                         | 69 (42.3)   |                               |
| Good personal hygiene                        | 8 (1.8)                       | 11 (2.9)   |                               | 10 (3.3)                           | 7 (4.3)     |                               |
| Sleeping under a bed net                     | 4 (0.9)                       | 3 (0.8)    |                               | 0 (0.0)                            | 0 (0.0)     |                               |
| Can't be prevented                           | 11 (2.4)                      | 36 (9.5)   |                               | 115 (38.2)                         | 59 (36.2)   |                               |
| Deworming every 3 months                     | 13 (2.9)                      | 110 (29.0) |                               | 91 (30.2)                          | 66 (40.5)   |                               |
| Eating properly cooked meals                 |                               |            |                               |                                    |             |                               |
| Total                                        | 451(100.0)                    | 380(100.0) |                               | 301(100.0)                         | 163 (100.0) |                               |

\*\*Multiple responses allowed and so totals for variable may exceed totals below.  $X^2(df)$  = Chi-square (degrees of freedom).

296 General knowledge on prevention of helminth infections saw majority of the participants across  
 297 both facilities and units ticking ‘clean environment’ and ‘good personal hygiene’. A smaller  
 298 proportion of ANC participants (2.4% in Adidome and 9.5% in Battor) however chose  
 299 “deworming every three months”. The corresponding proportion of delivery participants were  
 300 38.2% in Adidome and 36.2% in Battor.

301 Information in Table 8 is the mean scores on knowledge about helminthiasis across  
 302 sociodemographic characteristics estimated as percentages of correct answers from the series of  
 303 questions to determine participant knowledge. Across age categories, participants in Battor  
 304 received higher scores than their counterparts in Adidome with the 40+ age category showing the  
 305 highest mean score of  $31.9 \pm 11.5$ .

306 **Table 8: Knowledge on helminths across sociodemographic characteristics**

|                         | Knowledge level, Mean (SD) |             |
|-------------------------|----------------------------|-------------|
|                         | Adidome                    | Battor      |
| <u>Age (years)</u>      |                            |             |
| <20                     | 16.1 (11.3)                | 19.9 (14.3) |
| 20 – 29                 | 17.6 (10.5)                | 24.9 (15.5) |
| 30 – 39                 | 19.1 (10.7)                | 29.1 (16.4) |
| 40+                     | 16.7 (12.7)                | 31.9 (11.5) |
| <u>Residence</u>        |                            |             |
| Adidome                 | 17.0 (10.8)                | 20.2 (18.0) |
| Battor                  | 25.2 (8.4)                 | 27.3 (15.9) |
| Other                   | 17.4 (10.6)                | 24.6 (15.5) |
| <u>Marital status</u>   |                            |             |
| Married                 | 18.1 (11.1)                | 27.9 (15.4) |
| Single                  | 16.9 (10.3)                | 19.2 (14.2) |
| Cohabiting              | 19.0 (0.0)                 | 10.8 (12.2) |
| <u>Formal education</u> |                            |             |
| None                    | 15.4 (10.1)                | 21.8 (15.0) |
| Primary                 | 15.7 (10.4)                | 21.0 (14.6) |
| Junior High School      | 17.9 (10.6)                | 24.3 (14.4) |
| Senior High School      | 22.5 (10.6)                | 29.0 (14.9) |
| Tertiary                | 25.9 (16.0)                | 42.9 (14.0) |
| <u>Gravida</u>          |                            |             |
| Primigravidae           | 16.8 (10.6)                | 24.6 (15.0) |
| Multigravidae           | 18.1 (10.9)                | 26.5 (16.0) |

307 Overall knowledge level scale: 0 (Lowest) to 100 (Highest).

308

309



310 A similar trend was observed across marital status where participants in Battor received higher  
311 scores than those in Adidome. Mean scores across all the other sociodemographic characteristics  
312 show participants in Battor with higher scores.

### 313 **Limitation**

314 Correlation or association between knowledge of helminth infection among the study population  
315 and prevalences observed could not be performed due to the very low prevalences observed. There  
316 were only 10 PCR schistosomiasis positive cases, nine from Battor with only two having  
317 background information and one *Necator americanus* positive case so could not be used for  
318 comparative analysis with knowledge. The Kato Katz data also showed three schistosomiasis  
319 positive cases and one positive *Trichuris*. Thus, comparative analysis could not be performed as  
320 well.

### 321 **Discussion**

322 The study set out to determine prevalence of intestinal helminths among pregnant women and  
323 compare local knowledge about helminthiasis in two rural communities where school children had  
324 been targets for helminth control to the total exclusion of the elderly and pregnant women.

#### 325 **Prevalence of STH and *S. mansoni***

326 The low prevalence observed among study participants compares to prevalences observed among  
327 school children in a previous study (13) in some three districts in the Volta region. Even though,  
328 known risk factors for helminth infections such as exposure to contaminated fresh-water bodies,  
329 soil contact activities through farming and other agricultural practices were present in the study  
330 areas. The very low prevalence observed may be due to preventive measures such as public  
331 education on ‘clean environment’ and ‘personal hygiene’ to which a considerable proportion of  
332 the participants attested (Table 7).

### 333 Deworming history and knowledge about dewormers

334 Although a high percentage of study participants reportedly do not regularly take dewormers  
335 (Table 2), that did not reflect in the prevalence of helminthic infection observed. Other factors not  
336 identified by the study might account for the low prevalence. Since deworming helps to reduce  
337 morbidity in infected individuals, there is the need for public education on the importance of  
338 periodic deworming most especially for the asymptomatic carriers.

### 339 Local knowledge about causes, symptoms and prevention of 340 helminth infections

341 The overall low level of knowledge observed (Table 4 and Figure 1) coupled with other existing  
342 predisposing factors indicated that the study populations were at risk of helminth infections. This  
343 observation was confirmed by the observation that a high percentage of participants indicated no  
344 knowledge of preventive measures during pregnancy (Table 5). This low-level knowledge could  
345 also account for the study populations' dislike for deworming as a preventive measure. Battor as  
346 a community has more schools than Adidome. Consequently, it was expected of participants from  
347 Battor to show better knowledge about helminthiasis as has been observed in Table 4.

348 Common perception of risk of helminth infection among study participants were anemia,  
349 pregnancy complications and low birth weight.

### 350 **Conclusion**

351 In spite of the low prevalence observed, the study revealed low knowledge about helminthiasis  
352 among the study population. The cause for the low prevalence of helminth infection among study  
353 participants could not be identified. Intensifying health education as community-based  
354 interventions is still necessary for the effective control and elimination of schistosomiasis and soil  
355 transmitted helminths in the study area. There is also the need to include pregnant women in future  
356 control programs to achieve complete elimination of intestinal helminths.

## 357 **Acknowledgements**

358 Sincere thanks and gratitude to IRD (Institut de Recherche pour le Développement), funders of  
359 this study and to Mr. Tony Godi (School of Public Health, University of Ghana) for the analysis  
360 of the data. Our deepest appreciation to the staff of Battor Catholic Hospital and the staff of  
361 Adidome Government Hospital for all their assistance.

## 362 **Reference**

- 363 1. Palmeirim MS, Hürlimann E, Knopp S, Speich B, Belizario V, Joseph SA, et al. Efficacy  
364 and safety of co-administered ivermectin plus albendazole for treating soil-transmitted  
365 helminths: A systematic review, meta-analysis and individual patient data analysis. PLoS  
366 Negl Trop Dis. 2018;12(4):1–26.
- 367 2. The Fifty-fourth WH, Assembly. (Ninth plenary meeting , 22 May 2001 – Committee A ,  
368 fifth report). 2010;(3):3–5.
- 369 3. Brummaier T, Tun NW, Min AM, Gilder ME, Archasuksan L, Proux S, et al. Burden of  
370 soil-transmitted helminth infection in pregnant refugees and migrants on the Thailand-  
371 Myanmar border: Results from a retrospective cohort. PLoS Negl Trop Dis. 2021;15(3):1–  
372 16.
- 373 4. Corley AG, Thornton CP, Glass NE. The Role of Nurses and Community Health Workers  
374 in Confronting Neglected Tropical Diseases in Sub-Saharan Africa : A Systematic  
375 Review. 2016;1–24.
- 376 5. Adu-Gyasi D, Asante KP, Frempong MT, Gyasi DK, Iddrisu LF, Ankrah L, et al.  
377 Epidemiology of soil transmitted Helminth infections in the middle-belt of Ghana, Africa.  
378 Parasite Epidemiol Control [Internet]. 2018;3(3):e00071. Available from:  
379 <https://doi.org/10.1016/j.parepi.2018.e00071>

- 380 6. Djuardi Y, Lazarus G, Stefanie D, Fahmida U, Ariawan I, Supali T. Soil-transmitted  
381 helminth infection, anemia, and malnutrition among preschool-age children in  
382 Nangapanda subdistrict, Indonesia. PLoS Negl Trop Dis [Internet]. 2021;15(6):e0009506.  
383 Available from: <http://dx.doi.org/10.1371/journal.pntd.0009506>
- 384 7. Anyan WK, Abonie SD, Aboagye-Antwi F, Tettey MD, Nartey LK, Hanington PC, et al.  
385 Concurrent *Schistosoma mansoni* and *Schistosoma haematobium* infections in a peri-  
386 urban community along the Weija dam in Ghana: A wake up call for effective National  
387 Control Programme. Acta Trop [Internet]. 2019;199(May):105116. Available from:  
388 <https://doi.org/10.1016/j.actatropica.2019.105116>
- 389 8. Adam I, ALhabardi NA, Al-Wutayd O, Khamis AH. Prevalence of schistosomiasis and its  
390 association with anemia among pregnant women: a systematic review and meta-analysis.  
391 Parasites and Vectors [Internet]. 2021;14(1):1–10. Available from:  
392 <https://doi.org/10.1186/s13071-021-04642-4>
- 393 9. Taghipour A, Ghodsian S, Jabbari M, Olfatifar M, Abdoli A, Ghaffarifar F. Global  
394 prevalence of intestinal parasitic infections and associated risk factors in pregnant women:  
395 A systematic review and meta-analysis. Trans R Soc Trop Med Hyg. 2021;115(5):457–70.
- 396 10. Adam Z, Ameme DK, Nortey P, Afari EA, Kenu E. Determinants of low birth weight in  
397 neonates born in three hospitals in Brong Ahafo region , Ghana , 2016- an unmatched  
398 case-control study. 2019;6:1–9.
- 399 11. Wepnje GB, Anchang-kimbi JK, Ndassi VD, Lehman LG, Kimbi HK. *Schistosoma*  
400 *haematobium* infection status and its associated risk factors among pregnant women in  
401 Munyenge , South West Region , Cameroon following scale-up of communal piped water  
402 sources from 2014 to 2017 : a cross-sectional study. 2019;1–10.

- 403 12. WHO. Guideline: preventive chemotherapy to control soil-transmitted helminths  
404 infections in at risk population groups. Geneva: World Health Organization; 2017.  
405 Licence: CC BY-NC-SA 3.0 IGO. WHO Press. 2017. CC BY-NC-SA 3.0 IGO.
- 406 13. Orish V, Ofori-Amoah J, Amegan-Aho K, Mac-Ankrah L, Jamfaru I, Afeke I, et al. Low  
407 Prevalence of Helminth Infections among Primary School Children in the Volta Region of  
408 Ghana. *Asian J Med Heal*. 2017;5(3):1–9.
- 409 14. Ahiadorme M, Morhe E. Soil transmitted helminth infections in Ghana: A ten year review.  
410 *Pan Afr Med J*. 2020;35:1–16.
- 411 15. Ghana Statistical Service. North Tongu District. *In*: 2010 Population and Housing census.  
412 2014.
- 413 16. Ghana Statistical Service. Central Tongu District. *In*: 2010 Population and housing  
414 Census. 2014.
- 415 17. Yatich NJ, Yi J, Agbenyega T, Turpin A, Rayner JC, Stiles JK, et al. Malaria and  
416 intestinal helminth co-infection among pregnant women in Ghana: Prevalence and risk  
417 factors. *Am J Trop Med Hyg*. 2009;80(6):896–901.
- 418 18. Wekesa AW, Mulambalah CS, Muleke CI, Odhiambo R. Intestinal helminth infections in  
419 pregnant women attending antenatal clinic at Kitale District Hospital, Kenya. *J Parasitol*  
420 *Res*. 2014;2014.  
421  
422
